# Supplementary material
Source: PubMed Central journal article supplement (PMC3962500)

Figure S5

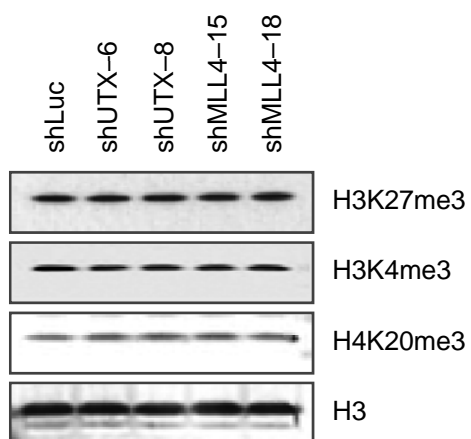

Supplement: NIHMS559572-supplement-7.pdf [file NIHMS559572-supplement-7.pdf]

Figure S6

**A**

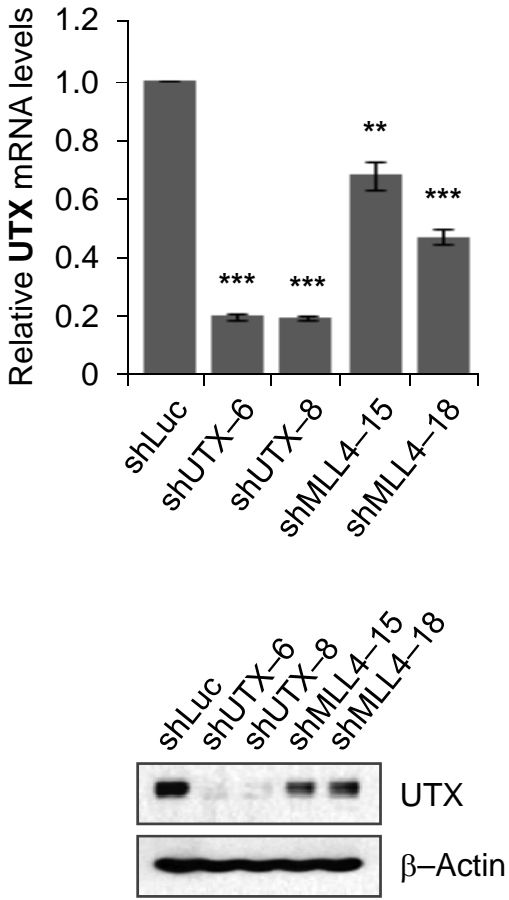

**B**

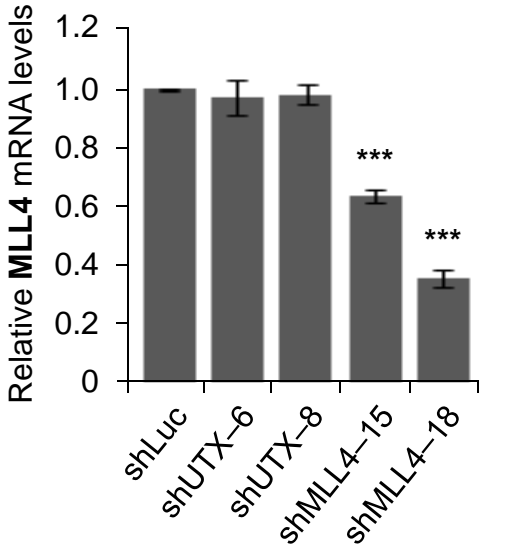

Supplement: NIHMS559572-supplement-8.pdf [file NIHMS559572-supplement-8.pdf]
